# Supplementary material
Source: Springer Nature journal article supplement (https://www.springermedizin.de/resource/supplementary/12931_2013_1415_MOESM4_ESM.pdf/9425956)

**A**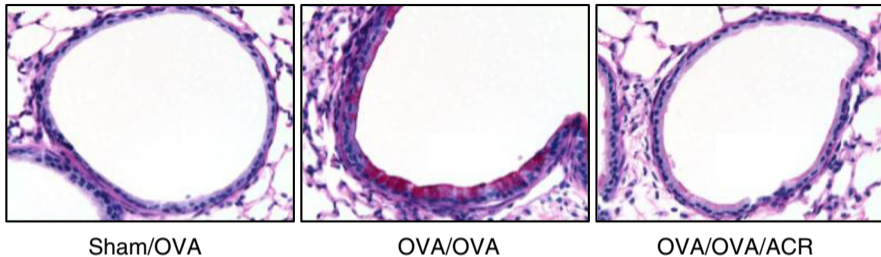**B**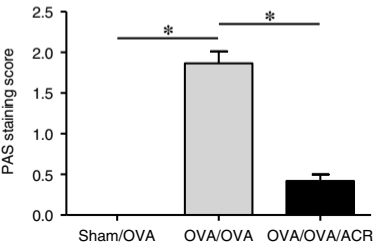**C**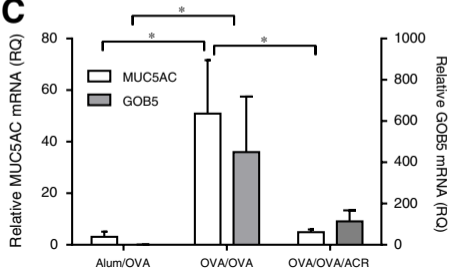

Supplement: MOESM4 [file 9425956]
